# Supplementary material for: Identification of early and late flowering time candidate genes in endodormant and ecodormant almond flower buds
Source: Tree Physiol. 2020 Nov 16;41(4):589–605. doi: 10.1093/treephys/tpaa151 (PMC8033246; doi:10.1093/treephys/tpaa151)
Supplement: Supplemental_R3_tpaa151 [file supplemental_r3_tpaa151.pdf]

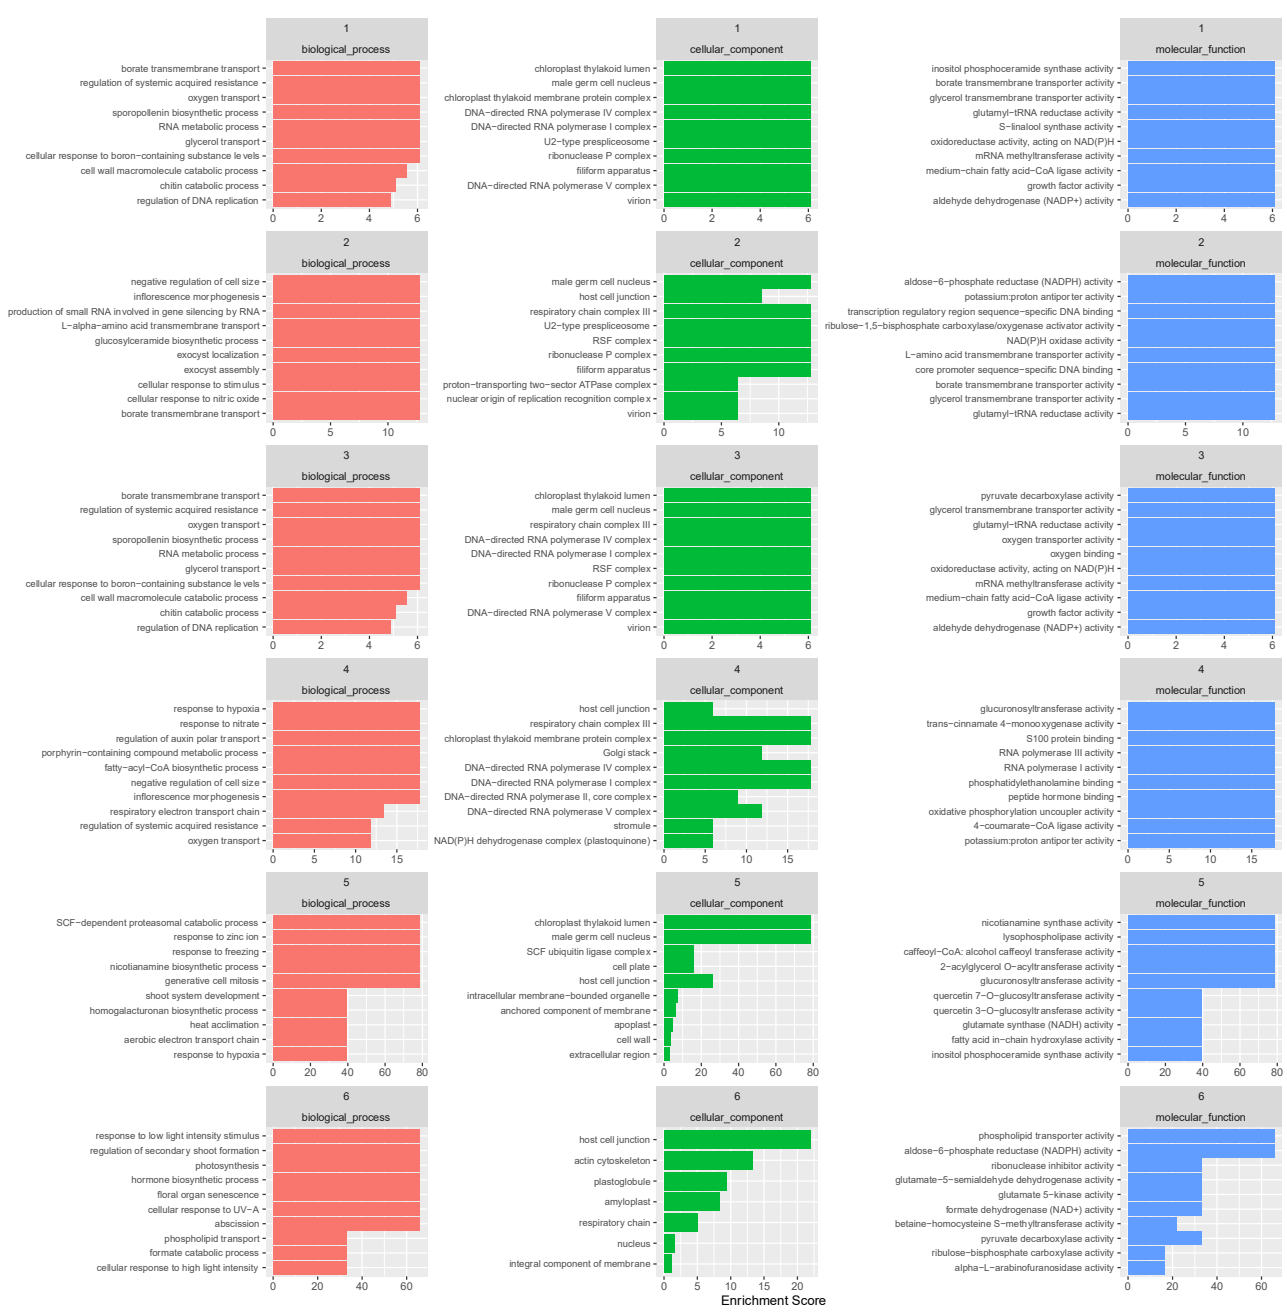

**Figure S2.** GO categories representation related to the enrichment score in clusters 1-6: Biological processes (red bars), cellular components (green bars) and molecular functions (blue bars).

**Table S1.** Experimental design for RNA sequencing and validation of almond flower buds: Samples (15 flower buds/tree/cultivar) from three cultivars with contrasting flowering time and chilling requirement (highlighted) were selected for RNA extraction and sequencing (A, AB, B) collected on Season 1 dates indicated. Samples collected during Season 2 were used together with those from Season 1 for RNA-seq validation by qRT-PCR. Million reads and reads conted (%) per sequenced sample. CP: Chill Portions.

|          | Flowering time (date) |               | Flower bud samples |                          | Chill accumulated (CP) |          | RNAseq output data (Season 1) |                 |
|----------|-----------------------|---------------|--------------------|--------------------------|------------------------|----------|-------------------------------|-----------------|
| Cultivar | Season 1              | Season 2      | State              | Sampling date (Season 1) | Season 1               | Season 2 | Million reads                 | % reads counted |
| Desmayo  | January 28th          | January 27th  | A                  | 11/10/2015               | 0                      | 5.0      | 106.2                         | 73.6            |
| Desmayo  |                       |               | A-B                | 12/1/2015                | 7.1                    | 9.1      | 121.3                         | 73.4            |
| Desmayo  |                       |               | B                  | 12/21/2015               | 16.1                   | 20.1     | 108.3                         | 74.5            |
| Penta    | February 10th         | February 2nd  | A                  | 11/10/2015               | 0                      | 5.0      | 91.9                          | 76.8            |
| Penta    |                       |               | A-B                | 1/12/2016                | 25                     | 29.2     | 115                           | 74.3            |
| Penta    |                       |               | B                  | 2/10/2016                | 41.2                   | 53.8     | 96.9                          | 74.6            |
| Tardona  | February 23rd         | February 10th | A                  | 11/10/2015               | 0                      | 5.0      | 90                            | 75.4            |
| Tardona  |                       |               | A-B                | 2/10/2016                | 41.2                   | 44.8     | 105.3                         | 74.4            |
| Tardona  |                       |               | B                  | 3/1/2016                 | 49.2                   | 60.6     | 99.5                          | 75.3            |

**Table S6.** qRT-PCR primers sequence, melting temperature and amplicon size of DEGs used for RNA-seq validation. Tm: Melting temperature.

| DEG name                             | Forward primer (5'-3')   | Tm (°C) | Reverse primer (5'-3') | Tm (°C) | Amplicon size (bp) |
|--------------------------------------|--------------------------|---------|------------------------|---------|--------------------|
| <i>XET</i>                           | GGTTTGGTTCTGGGTTCT       | 56.16   | GCTTTGCCTTTACTCGGT     | 56.8    | 115                |
| <i>4CLL1</i>                         | G TTCAGCAGGAGCCACTT      | 59.1    | ACAAGAATGGATGGCTTCA    | 56.00   | 123                |
| <i>NIP7</i>                          | TTGAAGTTTGAGGAGATGGAACAG | 59.73   | GGCCAATAAAGACTCGGTTCAA | 60.02   | 111                |
| <i>GLUCAN ENDO-β-1,3-GLUCOSIDASE</i> | AAC TCCCTCCCTCTCCATC     | 59.09   | CGGTGAGGTGGTTCTGGA     | 60.46   | 94                 |
| <i>EG1</i>                           | CTCCAGGGGTATATTGGG       | 54.82   | AAGAGACCTGGAACAAAAG    | 53.99   | 148                |
| <i>SWEET10</i>                       | GTGATGAGAAAAGTGGCAT      | 54.88   | CCAGTGCCAACATTTTATAC   | 53.95   | 152                |
| <i>AIP2</i>                          | ATGCAAGCGTCGTGGTAA       | 59.25   | TGGGGTTTGTGTCCGTTT     | 59.23   | 93                 |
| <i>DAM-like 1</i>                    | CCTCCACTTCTTAACCAGA      | 55.02   | TGCTCCCAGTCTCTCTCT     | 58.00   | 93                 |
| <i>DAM-like 2</i>                    | AGGAACTTGAGGAGAAGAG      | 54.72   | TCAGTTCTTCCTCAGTTTCA   | 55.31   | 141                |
| <i>LOX3.1</i>                        | TACGTAGCCAATGGTGTA       | 54.33   | CGAGATCAAAGCGTGTTT     | 55.26   | 126                |
| <i>RS5</i>                           | CTAGAAGGGGGAGAACGA       | 55.28   | CCTAGAGAACGAGACCCA     | 54.94   | 80                 |
| <i>ATHB12</i>                        | CTGCAACTGAATAACCAAGG     | 56.01   | TACAGCATACTCAGAGCC     | 54.86   | 90                 |
| <i>NCED5</i>                         | CTTTGGGGTGTGTTTTTCT      | 55.64   | CTCTTCCTCCTCTTCTCT     | 56.00   | 80                 |
| <i>OEP16</i>                         | CCACGGACCTTTCTAAA        | 55.63   | TGAGCACACTTTGAAGAAG    | 54.77   | 99                 |
| <i>60S</i>                           | ATACCAGTTGAAGGATCGT      | 55.45   | GGAATATGAGTTGCTAAGAAGG | 55.44   | 105                |

**Table S7.** Pearson correlation ( $r$ ) values of gene expression data calculated between RNA-seq TPMs and qRT-PCR data from sequenced samples (A, AB and B) of season 1 (highlighted in grey) and the  $r$  values calculated between qRT-PCR data from season 1 and season 2 (A, A2, AB, AB2, B).

|                                                       | Season 1 samples<br>(RNAseq vs qRT-PCR) |       |         | Season 1 vs Season 2 samples<br>(qRT-PCR) |       |         |
|-------------------------------------------------------|-----------------------------------------|-------|---------|-------------------------------------------|-------|---------|
|                                                       | Desmayo                                 | Penta | Tardona | Desmayo                                   | Penta | Tardona |
| <i>RS5</i>                                            | 0.98                                    | 0.99  | 1.00    | 0.91                                      | 0.35  | 0.93    |
| <i>ATHB12</i>                                         | 1.00                                    | 0.00  | 0.98    | 0.20                                      | 0.01  | 1.00    |
| <i>NCED5</i>                                          | 1.00                                    | 1.00  | 1.00    | 0.95                                      | 0.99  | 0.93    |
| <i>LOX3.1</i>                                         | 1.00                                    | 0.98  | 1.00    | 0.83                                      | 0.22  | 0.98    |
| <i>DAM-like 1</i>                                     | 1.00                                    | 0.98  | 0.96    | 0.84                                      | 1.00  | 1.00    |
| <i>DAM-like 2</i>                                     | 1.00                                    | 1.00  | 0.99    | 0.87                                      | 0.98  | 1.00    |
| <i>AIP2</i>                                           | 0.96                                    | 0.99  | 1.00    | 0.89                                      | 0.91  | 0.97    |
| <i>SWEET10</i>                                        | 1.00                                    | 1.00  | 0.88    | 0.90                                      | 0.70  | 0.94    |
| <i>4CLL1</i>                                          | 1.00                                    | 1.00  | 1.00    | 0.18                                      | 0.95  | 0.84    |
| <i>XET2</i>                                           | 1.00                                    | 1.00  | 0.97    | 1.00                                      | 1.00  | (-0.24) |
| <i>GLUCAN ENDO-<math>\beta</math>-1,3-GLUCOSIDASE</i> | 1.00                                    | 0.96  | 1.00    | 0.98                                      | 0.97  | 0.73    |
| <i>EG1</i>                                            | 1.00                                    | 1.00  | 1.00    | 0.58                                      | 0.97  | 0.89    |
| <i>NIP7</i>                                           | 0.99                                    | 0.99  | 0.99    | 0.98                                      | 0.98  | 0.76    |
