# Supplementary material for: Identification of early and late flowering time candidate genes in endodormant and ecodormant almond flower buds
Source: PubMed Central journal article supplement (PMC8033246; doi:10.1093/treephys/tpaa151), 2020-11-16
Supplement: table_s1_tpaa151.pdf [file table_s1_tpaa151.pdf]

**Table S1.** Experimental design for RNA sequencing and validation of almond flower buds: Samples (15 flower buds/tree/cultivar) from three cultivars with contrasting flowering time and chilling requirement (highlighted) were selected for RNA extraction and sequencing (A, AB, B) collected on Season 1 dates indicated. Samples collected during Season 2 were used together with those from Season 1 for RNA-seq validation by qRT-PCR. Million reads and reads counted (%) per sequenced sample. CP: Chill Portions.

| Cultivar         | Flowering time (date) |               | Flower bud samples |                          | Chill accumulated (CP) |          | RNAseq output data (Season 1) |                 |
|------------------|-----------------------|---------------|--------------------|--------------------------|------------------------|----------|-------------------------------|-----------------|
|                  | Season 1              | Season 2      | State              | Sampling date (Season 1) | Season 1               | Season 2 | Million reads                 | % reads counted |
| Desmayo Langueta |                       |               | A                  | 11/10/2015               | 0                      | 5.0      | 106.2                         | 73.6            |
| Desmayo Langueta | January 28th          | January 27th  | A-B                | 12/1/2015                | 7.1                    | 9.1      | 121.3                         | 73.4            |
| Desmayo Langueta |                       |               | B                  | 12/21/2015               | 16.1                   | 20.1     | 108.3                         | 74.5            |
| Penta            |                       |               | A                  | 11/10/2015               | 0                      | 5.0      | 91.9                          | 76.8            |
| Penta            | February 10th         | February 2nd  | A-B                | 1/12/2016                | 25                     | 29.2     | 115                           | 74.3            |
| Penta            |                       |               | B                  | 2/10/2016                | 41.2                   | 53.8     | 96.9                          | 74.6            |
| Tardona          |                       |               | A                  | 11/10/2015               | 0                      | 5.0      | 90                            | 75.4            |
| Tardona          | February 23rd         | February 10th | A-B                | 2/10/2016                | 41.2                   | 44.8     | 105.3                         | 74.4            |
| Tardona          |                       |               | B                  | 3/1/2016                 | 49.2                   | 60.6     | 99.5                          | 75.3            |
